# Supplementary material for: Icariin in Combination with Amoxycillin-Clavulanate and Ampicillin, but Not Vancomycin, Increases Antibiotic Sensitivity and Growth Inhibition against Methicillin-Resistant Staphylococcus aureus
Source: MDPI journal article supplement (doi:10.3390/antibiotics11020233), 2022-02-11
Supplement: s1 [file s1]

### Supplementary Materials

**Table S1.** Diameter inhibition zone of the antibiotics used in this study. All numbers represent the average values of at least three independent experiments.

| INHIBITION<br>ZONE (MM)   | AMOXYCLAV | AMPICILLIN | VANCOMYCIN | ICARIIN       |
|---------------------------|-----------|------------|------------|---------------|
| <b>CONTROL<br/>STRAIN</b> | 45,3      | 31,7       | 21,3       | No inhibition |
| <b>H-1</b>                | 21        | 18,3       | 18,3       | No inhibition |
| <b>H-2</b>                | 13,7      | 10,7       | 16,0       | No inhibition |
| <b>H-3</b>                | 15,0      | 11,0       | 16,3       | No inhibition |
| <b>H-4</b>                | 11,7      | 11,7       | 14,3       | No inhibition |
| <b>H-5</b>                | 10,3      | 9,3        | 17,7       | No inhibition |
| <b>H-6</b>                | 9,0       | 7,7        | 16,3       | No inhibition |
| <b>H-7</b>                | 9,7       | 8,0        | 16,3       | No inhibition |
| <b>H-8</b>                | 10,0      | 7,3        | 14,7       | No inhibition |
| <b>H-9</b>                | 25,3      | 18,0       | 18,3       | No inhibition |
| <b>A-1</b>                | 19,7      | 11,7       | 18,0       | No inhibition |
| <b>A-2</b>                | 17,3      | 12,7       | 20,3       | No inhibition |
| <b>A-3</b>                | 21,0      | 17,7       | 18,7       | No inhibition |
| <b>A-4</b>                | 19,0      | 16,7       | 16,7       | No inhibition |
| <b>A-5</b>                | 13,0      | 13,3       | 16,0       | No inhibition |
